# Supplementary material for: A conserved annexin A6–mediated membrane repair mechanism in muscle, heart, and nerve
Source: JCI journal article supplement (doi:10.1172/jci.insight.158107), 2022-07-21
Supplement: sd1 [file 1]

**Supplemental Figures and Legends For “A conserved annexin A6-mediated membrane repair mechanism in muscle, heart, and nerve”**

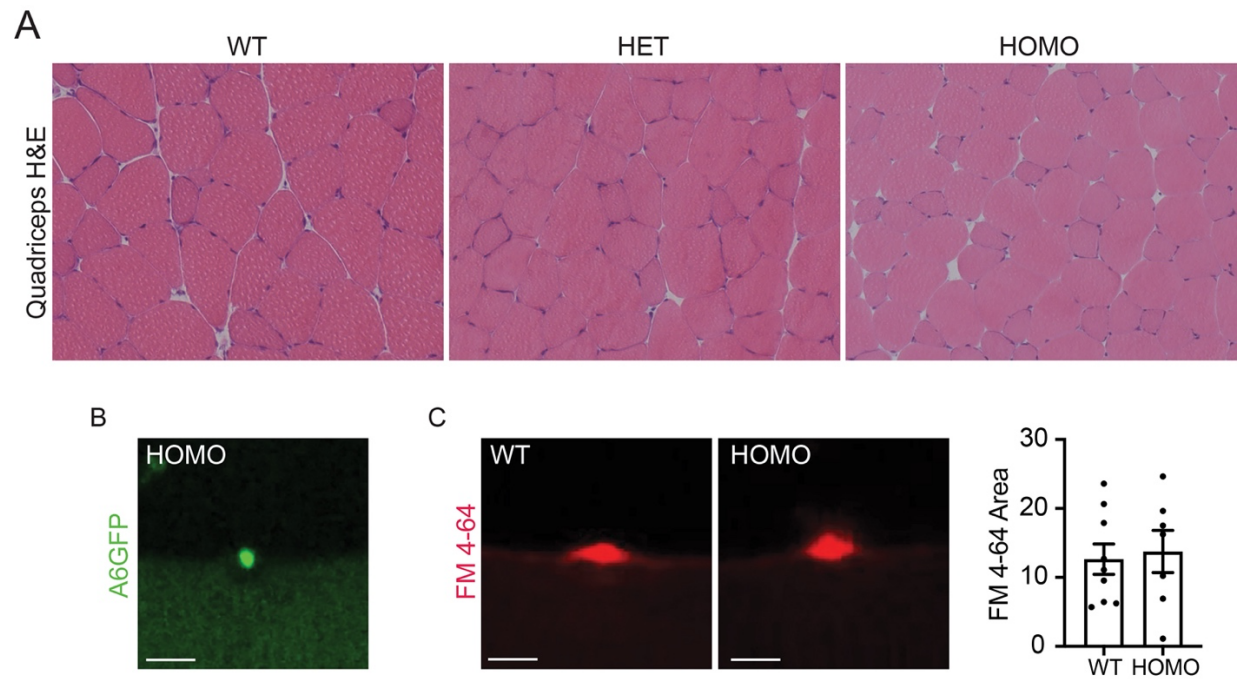

**Supplemental Figure 1. A)** Grossly normal muscle histopathology in heterozygous and homozygous *Anxa6gfp* tissue compared to wildtype control muscle. **B)** Upon laser-induced membrane injury, annexin A6GFP localized to the repair cap in homozygous *Anxa6gfp* myofibers. **C)** Similar FM 4-64 uptake after laser-induced membrane injury of wildtype and homozygous *Anxa6gfp* myofibers. Scale 5 $\mu$ m. n=3 mice per genotype, n  $\geq$  7 myofibers.

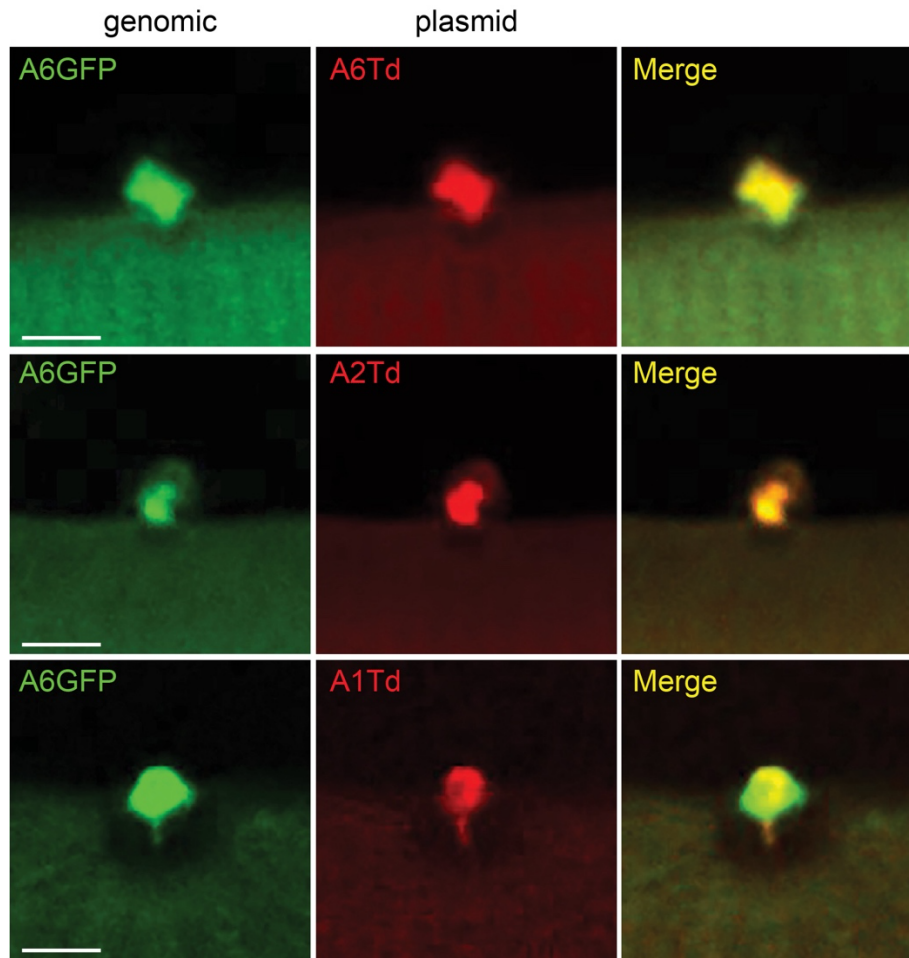

**Supplemental Figure 2. Genomically-encoded annexin A6GFP colocalizes with repair complex members at the site of injury.** Myofibers were isolated from heterozygous *Anxa6gfp* mice and electroporated with td-Tomato (red) tagged annexin A1, A2, or A6. Genomically-encoded annexin A6GFP (green) colocalizes with annexin A1, A2 and A6 at the site of membrane damage (merge, yellow). Z-stack images from an injured myofiber. Scale 5 $\mu$ m.  $n \geq 7$  myofibers per condition.

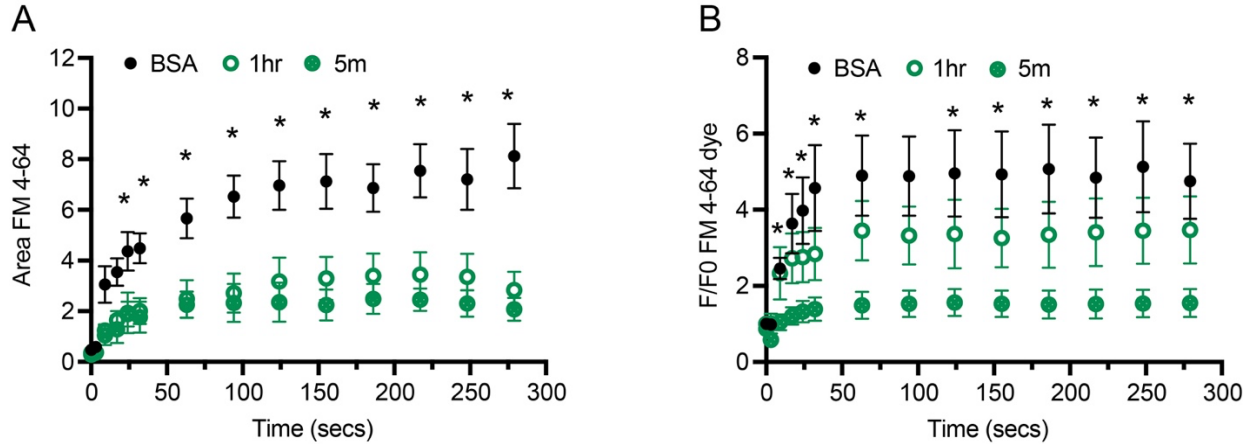

**Supplemental Figure 3. Recombinant annexin A6 treatment reduces FM dye uptake.**

Quantification of FM 4-64 dye overtime showed that FM 4-64 was significantly reduced with 1hr and 5mins of recombinant annexin A6 treatment throughout the imaging series measured as **(A)** FM area or **(B)** fluorescent intensity.  $n = 6-8$  myofibers from  $n \geq 3$  mice. \*  $P < 0.05$  by ANVOA.

## **Supplemental Movie Legends**

**Supplemental Movie 1.** Z-stack imaging of genomically encoded annexin A6GFP (green) repair cap localized at the site of myofiber injury.

**Supplemental Movie 2.** Timelapse imaging of genomically encoded annexin A6GFP (green) localizing to the site of cardiomyocyte membrane injury over 50 seconds.

**Supplemental Movie 3.** Timelapse imaging of genomically encoded annexin A6GFP (green) localizing to the site of neuron membrane injury over 60 seconds.

**Supplemental Movie 4.** Timelapse imaging of recombinant annexin A6 tdTomato (red) colocalizing with genomically encoded annexin A6GFP (green) repair cap at the site of muscle membrane injury.

**Supplemental Movie 5.** Recombinant annexin A6 tdTomato (red) forms blebs at the site of myofiber injury.

**Supplemental Movie 6.** Timelapse imaging of recombinant annexin A6 tdTomato (red) localizing to the site of neuron transection. WGA outlines the neuron in blue.

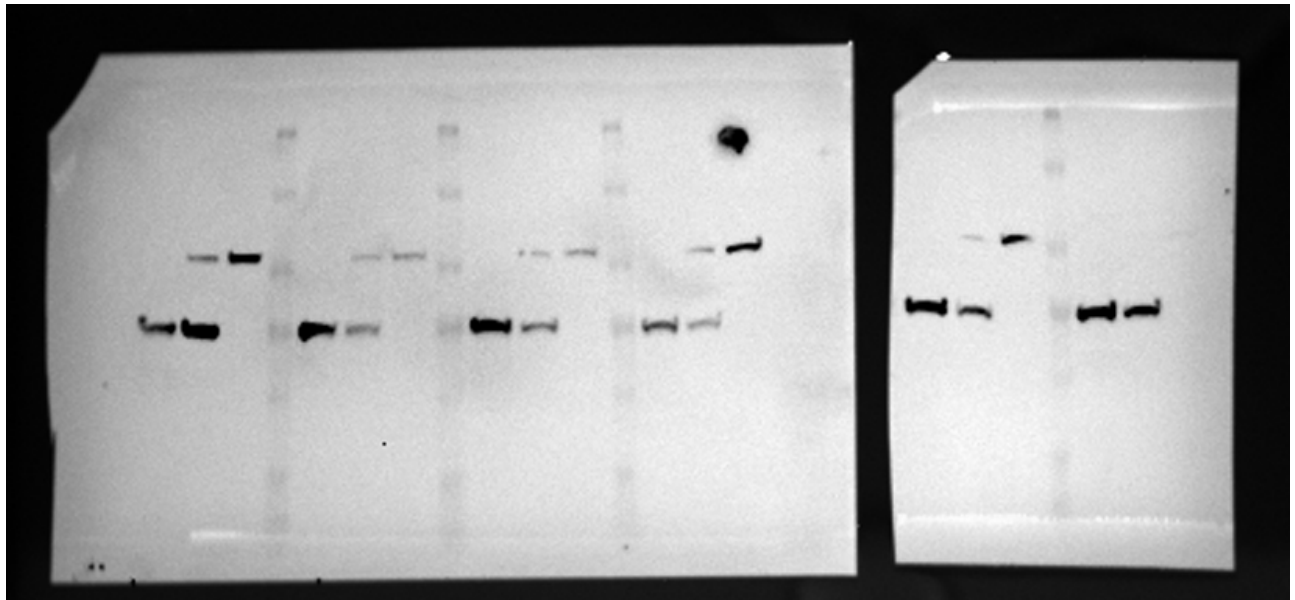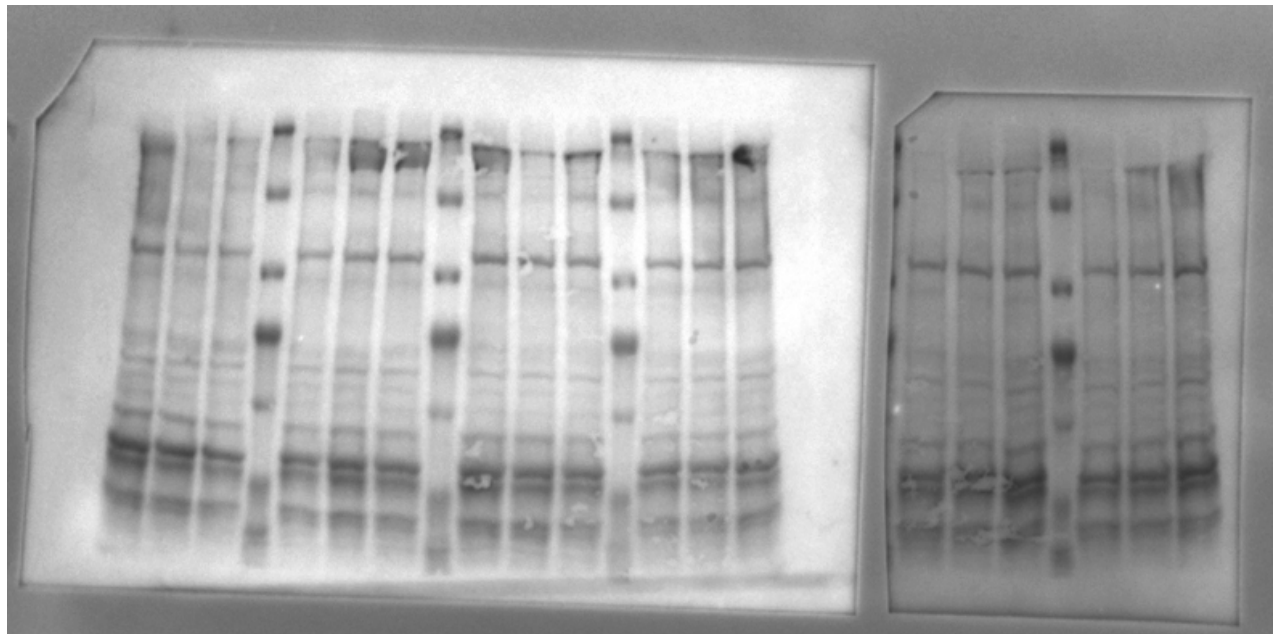

Full gels for Figure 2

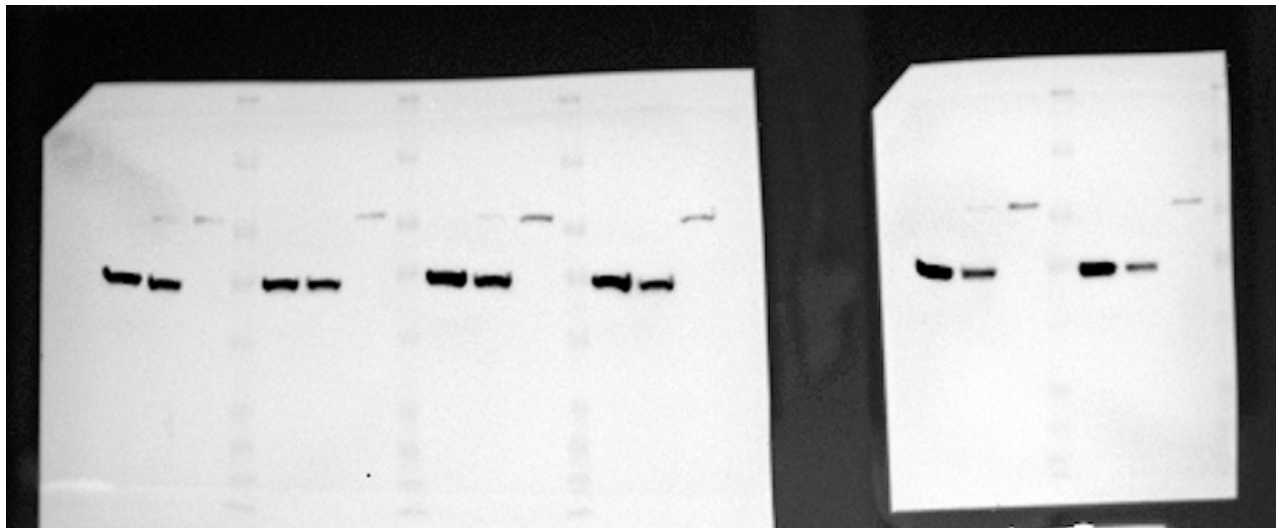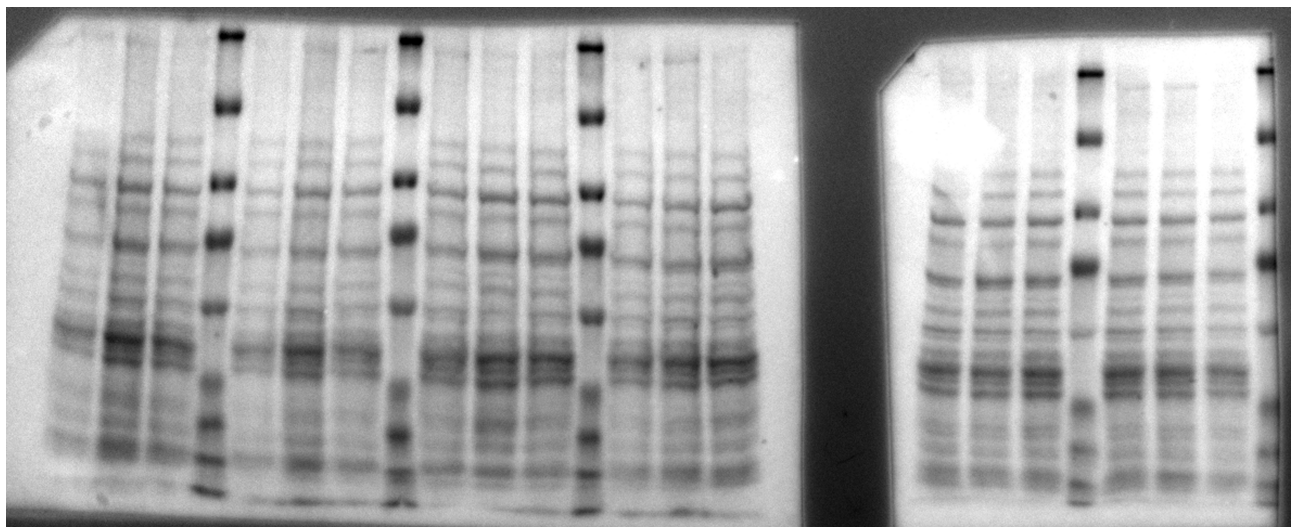

Full gels for Figure 3

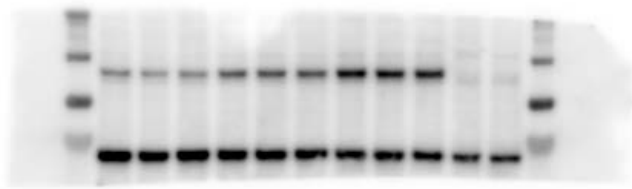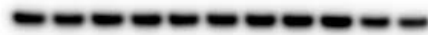

Full gels for Figure 4
